# Supplementary material for: Species interactions in an Andean bird–flowering plant network: phenology is more important than abundance or morphology
Source: PeerJ. 2016 Dec 13;4:e2789. doi: 10.7717/peerj.2789 (PMC5157195; doi:10.7717/peerj.2789)
Supplement: Table S2 [file peerj-04-2789-s005.xlsx]

## Sheet: network
Table A2. Interaction Network	Aglaeactis cupripennis	Coeligena torquata	Coeligena violifer	Conirrostrum ferrugineiventre	Diglossa brunneiventris	Diglossa cyanea	Diglossa mystacalis	Diglossa sittoides	Ensifera ensifera	Heliangelus amethysticollis	Lafresnaya lafresnayi	Lesbia victoriae	Metallura theresiae	Metallura tyrianthina	Patagona gigas	Pterophanes cyanopterus	Ramphomicrum microrhynchum	Grand Total
Berberis lutea													2					2
Bomarea brevis							1						7					8
Bomarea setacea													5					5
Brachyotum lutescens	1	1		1	5		10	2				2	45					67
Brachyotum naudini													7					7
Centropogon isabellinus	1						2				2		1					6
Desfontainea spinoza							1			1			7			2		11
Disterigma spp.							1						5					6
Dunalia brackiacantha													3					3
Fuchsia decussata	1		2		3	1	2						10			3		22
Gaiadendron punctatum				1	1								2	1			1	6
Gaultheria bracteata				3	1		1						3					8
Gentianella fruticulosa													3					3
Gentianella violacea													8	1				9
Greigia mcbrediana													3					3
Meriania radula													7					7
Miconia alpina										1			1					2
Moninna salicifolia	1												1					2
Passiflora cumbalensis					2								3	1		1		7
Pellegrinea hirsuta													1					1
Puya pseudoeryngioides		1			1								1		1			4
Ribes incarnatum							1						2					3
Rubus sp					1								10				1	12
Saracha punctata							1						1					2
Tristerix longibracteatus			2		1		15		2				4		3	38		65
Tropaeoleum bicolor			3															3
Vaccinium floribundum													4					4
Grand Total	4	2	7	5	15	1	35	2	2	2	2	2	146	3	4	44	2	278
