# Supplementary material for: Species interactions in an Andean bird–flowering plant network: phenology is more important than abundance or morphology
Source: PeerJ. 2016 Dec 13;4:e2789. doi: 10.7717/peerj.2789 (PMC5157195; doi:10.7717/peerj.2789)
Supplement: Table S3 [file peerj-04-2789-s006.xlsx]

## Sheet: charactheristics
Table A3. Identity and charactheristics of the plants and birds of the visitation network
Plants
Order	Family	Species	Corolla length (mm)	SD of corolla length (mm)
RANUNCUNALES	Berberidaceae	Berberis lutea	3.98333	0.74514
LILIALES	Alstroemeriaceae (Liliaceae)	Bomarea brevis	17.1727	3.41031
LILIALES	Alstroemeriaceae (Liliaceae)	Bomarea setacea	19.625	6.46413
MYRTALES	Melastomataceae	Brachyotum lutescens	13.3603	1.51215
MYRTALES	Melastomataceae	Brachyotum naudinii	15.9289	3.31042
ASTERALES	Campanulaceae	Centropogon isabellinus	23.7243	3.12105
GENTIANALES	Loganiaceae	Desfontainia spinosa	36.1333	2.15019
ERICALES	Ericaceae	Disterigma spp.**	8.22368	0.840667
SOLANALES	Solanaceae	Dunalia brachyacantha	18.3633	1.3515
MYRTALES	Onagraceae	Fuchsia decusatta	55.3814	8.84636
SANTALALES	Loranthaceae	Gaiadendron punctatum	5.0825	1.05117
ERICALES	Ericaceae	Gaultheria bracteata	6.70778	0.568062
GENTIANALES	Gentianaceae	Gentianella fruticulosa	8.36923	1.06824
GENTIANALES	Gentianaceae	Gentianella violacea	12.7605	2.15369
POALES	Bromeliaceae	Greigia macbrideana	30.6333	6.79877
MYRTALES	Melastomataceae	Meriania radula	6.76286	1.74724
MYRTALES	Melastomataceae	Miconia alpina	3.35	0.55
FABALES	Polygalaceae	Monnina salicifolia	3.125	0.545
VIOLALES	Passifloraceae	Passiflora cumbalensis	76.1917	10.6956
ERICALES	Ericaceae	Pellegrinia hirsuta	17.1767	1.35356
POALES	Bromeliaceae	Puya pseudoeryngioides	50	7.071
SAXIFRAGALES	Grossulariaceae	Ribes incarnatum	7.375	0.744
ROSALES	Rosaceae	Rubus sp.	13.2758	2.05138
SOLANALES	Solanaceae	Saracha punctata	20.54	3.03922
SANTALALES	Loranthaceae	Tristerix longebracteatus	31.1949	18.9272
BRASSICALES	Tropaeolaceae	Tropaeolum bicolor	54.6	6.19128
ERICALES	Ericaceae	Vaccinium floribundum	4.26	1.69
Birds
Order	Family	Species	Bill length +1/3 length (mm)	SD of bill + 1/3 length (mm)
APODIFORMES	Trochilidae	Coeligena torquata	43.2571	2.95332
APODIFORMES	Trochilidae	Coeligena violifer	44.2667	5.46829
PASSERIFORMES	Thraupidae	Conirrostrum ferrugineiventre	15.3333	0.942809
PASSERIFORMES	Thraupidae	Diglossa brunneiventris	11.7935	0.982115
PASSERIFORMES	Thraupidae	Diglossa cyanea	19.0952	1.08217
PASSERIFORMES	Thraupidae	Diglossa mystacalis	14.3156	1.88512
PASSERIFORMES	Thraupidae	Diglossa sittoides	11.6	0
APODIFORMES	Trochilidae	Ensifera ensifera	109.917	8.10595
APODIFORMES	Trochilidae	Heliangelus amethysticollis	21.8533	0.566471
APODIFORMES	Trochilidae	Lafresnaya lafresnayi	34.3407	2.01672
APODIFORMES	Trochilidae	Metallura theresiae	16.0497	1.16816
APODIFORMES	Trochilidae	Metallura tyrianthina	15.25	1.76158
APODIFORMES	Trochilidae	Patagona gigas	55.04	1.00399
APODIFORMES	Trochilidae	Pterophanes cyanopterus	40.081	3.71149
APODIFORMES	Trochilidae	Ramphomicrum microrhynchum	10.2267	0.306667
APODIFORMES	Trochilidae	Aglaeactis cupripennis	24.8533	0.346667
APODIFORMES	Trochilidae	Lesbia victoriae	19.5867	0.173333
*Length: Mesaurement of the exposed culmen plus a third in birds; measurement of the open corolla of a flower.
** Disterigma species could be alaternoides, microphillum or pernettyoides.
